# Supplementary material for: The Association between Socioeconomic Status, Smoking, and Chronic Disease in Inner Mongolia in Northern China
Source: PubMed Central journal article supplement (PMC6352126; doi:10.3390/ijerph16020169), 2019-01-09
Supplement: ijerph-16-00169-s001.pdf [file ijerph-16-00169-s001.pdf]

**Table S1.** The distribution of smoking status according to sex and socio-demographics characteristics.

| Variable                       | Male (n = 6721)     |                            |                             | $\chi^2$ | p-value                | Female (n = 6814)   |                            |                             | $\chi^2$ | p-value                |
|--------------------------------|---------------------|----------------------------|-----------------------------|----------|------------------------|---------------------|----------------------------|-----------------------------|----------|------------------------|
|                                | Nonsmoking<br>n (%) | Former<br>smoking<br>n (%) | Current<br>smoking<br>n (%) |          |                        | Nonsmoking<br>n (%) | Former<br>smoking<br>n (%) | Current<br>smoking<br>n (%) |          |                        |
| <b>Age</b>                     |                     |                            |                             | 318.191  | <0.001 <sup>^</sup>    |                     |                            |                             | 136.264  | <0.001 <sup>^</sup>    |
| <45                            | 1283 (47.01)        | 77 (2.82)                  | 1369 (50.16)                |          |                        | 2376 (92.96)        | 18 (0.70)                  | 162 (6.34)                  |          |                        |
| 45-59                          | 705 (33.68)         | 108 (5.16)                 | 1280 (61.16)                |          |                        | 1663 (84.16)        | 26 (1.32)                  | 287 (14.52)                 |          |                        |
| 60~                            | 582 (40.64)         | 211 (14.73)                | 639 (44.62)                 |          |                        | 1163 (82.72)        | 43 (3.06)                  | 200 (14.22)                 |          |                        |
| <b>Ethnicity</b>               |                     |                            |                             | 48.545   | <0.001 <sup>^</sup>    |                     |                            |                             | 5.758    | <0.001 <sup>^</sup>    |
| Han                            | 1953 (39.11)        | 340 (6.81)                 | 2700 (54.08)                |          |                        | 4038 (87.33)        | 74 (1.60)                  | 512 (11.07)                 |          |                        |
| Mongolian                      | 492 (50.57)         | 38 (3.91)                  | 443 (45.53)                 |          |                        | 867 (87.75)         | 10 (1.01)                  | 111 (11.23)                 |          |                        |
| Others                         | 118 (42.75)         | 18 (6.52)                  | 140 (50.72)                 |          |                        | 287 (91.11)         | 3 (0.95)                   | 25 (7.94)                   |          |                        |
| <b>Education level</b>         |                     |                            |                             | 79.754   | <0.001 <sup>^</sup>    |                     |                            |                             | 96.489   | <0.001 <sup>^</sup>    |
| Middle school and below        | 1654 (37.50)        | 293 (6.64)                 | 2464 (55.86)                |          |                        | 3792 (85.21)        | 71 (1.60)                  | 587 (13.19)                 |          |                        |
| High school and above          | 915 (49.67)         | 103 (5.59)                 | 824 (44.73)                 |          |                        | 1408 (94.75)        | 16 (1.08)                  | 62 (4.17)                   |          |                        |
| <b>Household annual income</b> |                     |                            |                             | 45.224   | <0.001 <sup>^</sup>    |                     |                            |                             | 39.864   | <0.001 <sup>^</sup>    |
| Low                            | 852 (37.82)         | 194 (8.61)                 | 1207 (53.57)                |          |                        | 1847 (84.38)        | 34 (1.55)                  | 308 (14.07)                 |          |                        |
| Middle                         | 1421 (43.75)        | 169 (5.20)                 | 1658 (51.05)                |          |                        | 2725 (88.97)        | 45 (1.47)                  | 293 (9.57)                  |          |                        |
| High                           | 297 (39.44)         | 33 (4.38)                  | 423 (56.18)                 |          |                        | 630 (91.84)         | 8 (1.17)                   | 48 (7.00)                   |          |                        |
| <b>Employment status</b>       |                     |                            |                             | 125.997  | <0.001 <sup>^</sup>    |                     |                            |                             | 16.435   | 0.002 <sup>&amp;</sup> |
| Unemployed                     | 242 (38.23)         | 76 (12.01)                 | 315 (49.76)                 |          |                        | 1025 (84.78)        | 21 (1.74)                  | 163 (13.48)                 |          |                        |
| Retired                        | 320 (45.65)         | 90 (12.84)                 | 291 (41.51)                 |          |                        | 609 (88.26)         | 16 (2.32)                  | 65 (9.42)                   |          |                        |
| Employed                       | 2006 (40.80)        | 230 (4.68)                 | 2681 (54.53)                |          |                        | 3562 (88.34)        | 50 (1.24)                  | 420 (10.42)                 |          |                        |
| <b>Marital status</b>          |                     |                            |                             | 237.585  | <0.001 <sup>^</sup>    |                     |                            |                             | 35.463   | <0.001 <sup>^</sup>    |
| Single                         | 528 (65.67)         | 19 (2.36)                  | 257 (31.97)                 |          |                        | 486 (94.92)         | 2 (0.39)                   | 24 (4.69)                   |          |                        |
| Widowed or divorced            | 115 (35.71)         | 31 (9.63)                  | 176 (54.66)                 |          |                        | 483 (83.42)         | 13 (2.25)                  | 83 (14.34)                  |          |                        |
| Married                        | 1926 (37.57)        | 346 (6.75)                 | 2855 (55.69)                |          |                        | 4231 (87.33)        | 72 (1.49)                  | 542 (11.19)                 |          |                        |
| <b>Settlement</b>              |                     |                            |                             | 20.947   | <0.001 <sup>^</sup>    |                     |                            |                             | 48.131   | <0.001 <sup>^</sup>    |
| Urban                          | 875 (45.24)         | 105 (5.43)                 | 954 (49.33)                 |          |                        | 1732 (91.93)        | 21 (1.11)                  | 131 (6.95)                  |          |                        |
| Rural                          | 1695 (39.24)        | 291 (6.74)                 | 2334 (54.03)                |          |                        | 3470 (85.59)        | 66 (1.63)                  | 518 (12.78)                 |          |                        |
| <b>Alcohol use</b>             |                     |                            |                             | 632.716  | <0.001 <sup>^</sup>    |                     |                            |                             | 125.249  | <0.001 <sup>^</sup>    |
| Yes                            | 691 (24.52)         | 162 (5.75)                 | 1965 (69.73)                |          |                        | 209 (67.86)         | 6 (1.95)                   | 93 (30.19)                  |          |                        |
| No                             | 1879 (54.69)        | 234 (6.81)                 | 1323 (38.50)                |          |                        | 4992 (88.68)        | 81 (1.44)                  | 556 (9.88)                  |          |                        |
| <b>BMI*</b>                    |                     |                            |                             | 16.360   | 0.003 <sup>&amp;</sup> |                     |                            |                             | 13.507   | 0.009 <sup>&amp;</sup> |
| <24                            | 1440 (39.39)        | 220 (6.02)                 | 1996 (54.60)                |          |                        | 3263 (86.53)        | 61 (1.62)                  | 447 (11.85)                 |          |                        |
| 24-28                          | 887 (44.13)         | 130 (6.47)                 | 993 (49.40)                 |          |                        | 1521 (89.42)        | 23 (1.35)                  | 157 (9.23)                  |          |                        |
| ≥28                            | 238 (41.50)         | 44 (7.70)                  | 292 (50.90)                 |          |                        | 408 (89.90)         | 2 (0.40)                   | 44 (9.70)                   |          |                        |

\*Body mass index

&p < 0.05

<sup>^</sup>p < 0.001
